# Supplementary material for: Molecular insights into kinetic stabilization of amorphous solid dispersion of pharmaceuticals
Source: Royal Society of Chemistry journal article supplement (doi:10.1039/d4cp03557g), 2024-12-09
Supplement: d4cp03557g1.pdf [file d4cp03557g1.pdf]

# Molecular Insights on Kinetic Stabilization of Amorphous Solid Dispersion of Pharmaceuticals

## Supplementary Information

*Vladislav Aulich<sup>a</sup>, Jan Ludík,<sup>a</sup> Michal Fulem,<sup>a</sup> Ctirad Červinka<sup>a,\*</sup>*

<sup>a</sup> Department of Physical Chemistry, University of Chemistry and Technology Prague, Technická 5,  
CZ-166 28 Prague 6, Czech Republic

\*Corresponding author: cervinke@vscht.cz

## S1. Excess properties

This section contains additional simulation results on excess molar volumes and excess enthalpies of bulk mixtures of target API and polymers. Numerical values of calculated excess properties and a benchmark plot of those are listed below.

**Table S1.** Excess molar volumes  $V^E$  (in  $\text{cm}^3 \text{mol}^{-1}$ ) and excess molar enthalpies  $H^E$  ( $\text{kJ mol}^{-1}$ ) of simulated mixtures of target API and polymers at various compositions and temperatures.

|     |                  | PLA            |                |                |               |
|-----|------------------|----------------|----------------|----------------|---------------|
|     |                  | 300 K          |                | 500 K          |               |
| API | $x_{\text{API}}$ | $V^E$          | $H^E$          | $V^E$          | $H^E$         |
| CBZ | 0.85             | $-5.5 \pm 0.3$ | $0.6 \pm 0.3$  | $0.9 \pm 0.5$  | $4.7 \pm 0.5$ |
|     | 0.92             | $-3.5 \pm 0.2$ | $0.5 \pm 0.2$  | $0.6 \pm 0.3$  | $3.2 \pm 0.3$ |
|     | 0.95             | $-2.3 \pm 0.2$ | $-0.1 \pm 0.2$ | $0.2 \pm 0.2$  | $2.7 \pm 0.2$ |
| IBU | 0.85             | $-9.6 \pm 0.4$ | $-1.3 \pm 0.4$ | $0.3 \pm 0.5$  | $3.3 \pm 0.5$ |
|     | 0.92             | $-6.5 \pm 0.3$ | $-0.3 \pm 0.2$ | $0.1 \pm 0.3$  | $2.6 \pm 0.3$ |
|     | 0.95             | $-5.3 \pm 0.2$ | $0.2 \pm 0.2$  | $-0.1 \pm 0.2$ | $2.1 \pm 0.2$ |
| IND | 0.85             | $-7.3 \pm 0.3$ | $5.2 \pm 0.3$  | $-1.2 \pm 0.6$ | $8.6 \pm 0.7$ |
|     | 0.92             | $-3.9 \pm 0.2$ | $4.7 \pm 0.2$  | $-1.7 \pm 0.3$ | $6.4 \pm 0.3$ |
|     | 0.95             | $-3.0 \pm 0.2$ | $2.0 \pm 0.2$  | $-2.0 \pm 0.3$ | $3.5 \pm 0.4$ |
| NAP | 0.85             | $-5.0 \pm 0.3$ | $4.4 \pm 0.3$  | $3.3 \pm 0.5$  | $7.5 \pm 0.5$ |
|     | 0.92             | $-2.2 \pm 0.2$ | $3.9 \pm 0.3$  | $2.6 \pm 0.3$  | $6.3 \pm 0.3$ |
|     | 0.95             | $-1.8 \pm 0.1$ | $3.4 \pm 0.1$  | $1.5 \pm 0.2$  | $4.7 \pm 0.2$ |

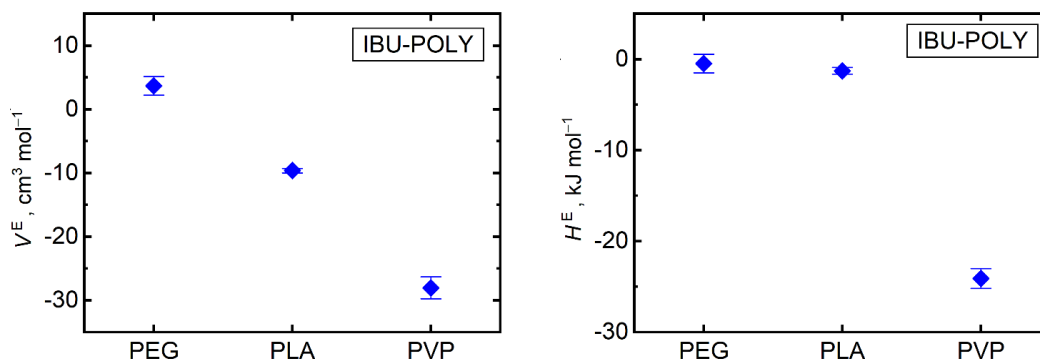

**Figure S1.** Excess molar volumes ( $V^E$ ) and enthalpies  $H^E$  (in  $\text{kJ mol}^{-1}$ ) of simulated mixtures of IBU and target API at equimolar composition and temperature 300 K.

## S2. Structural aspects

This section contains additional simulation results on structural characterization of bulk mixtures of target API and polymers. Plots of small-angle neutron scattering profiles, radial distribution functions, spatial coordination functions and a comparison of coordination numbers are given below.

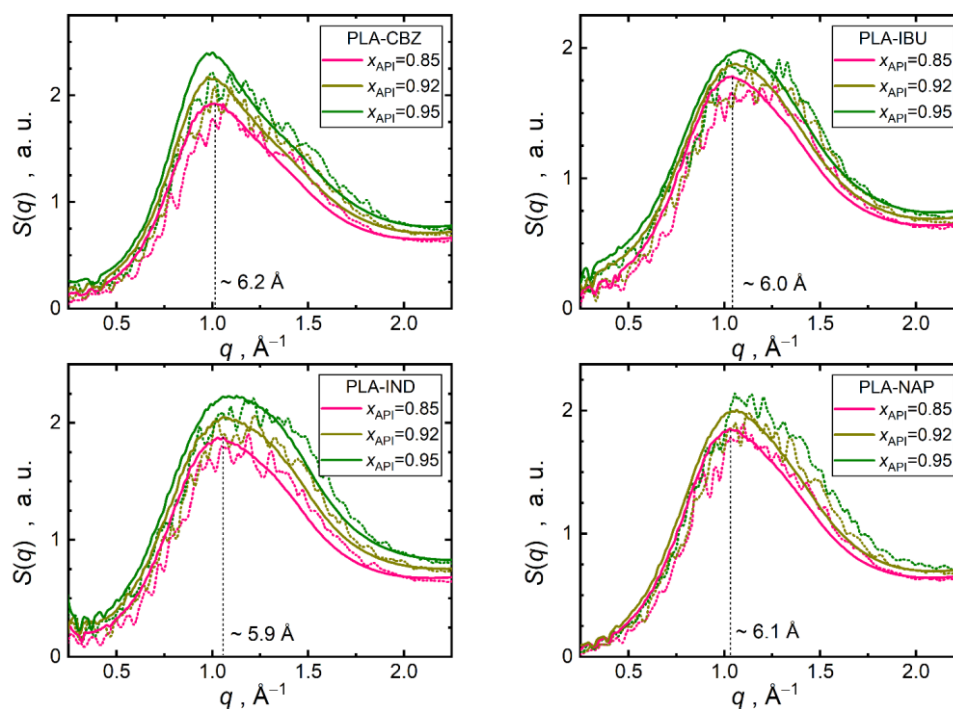

**Figure S2.** Static structure factors  $S(q)$  simulating the small-angle neutron diffraction for individual considered dispersions of API and polymers, data for 500 K and 300 K are given with solid and dashed lines, respectively.

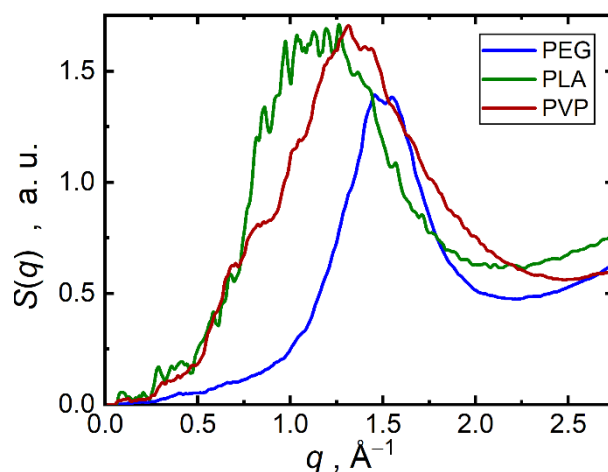

**Figure S3.** Static structure factors  $S(q)$  simulating the small-angle neutron diffraction for dispersions of IBU ( $x_{\text{IBU}}=0.85$ ) with individual polymers at 300 K.

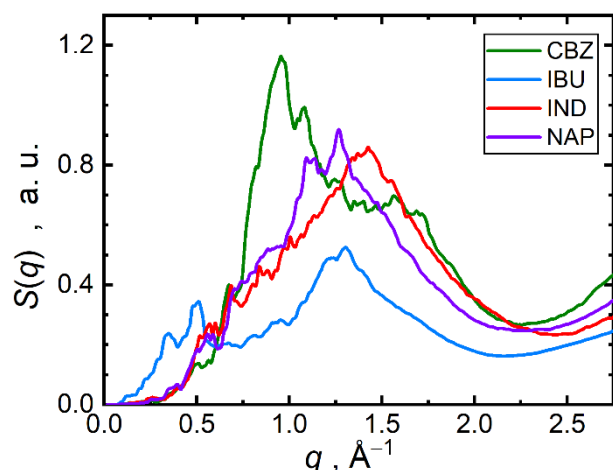

**Figure S4.** Static structure factors  $S(q)$  simulating the small-angle neutron diffraction for individual considered pure amorphous API at 300 K.

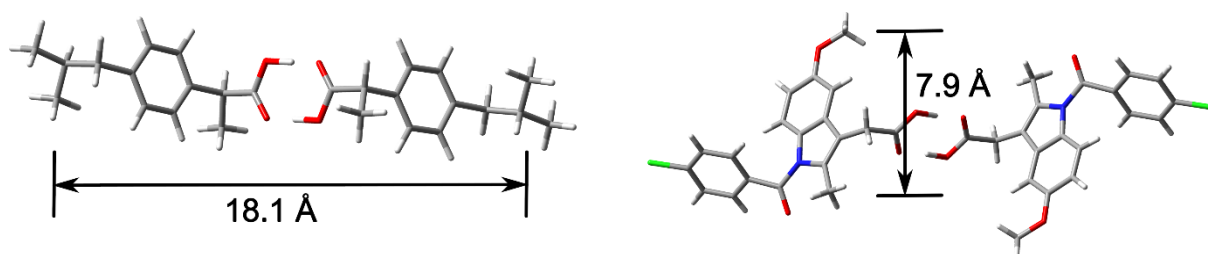

**Figure S5.** Characteristic dimensions of optimized geometries of the closest carboxyl-dimers of ibuprofen and indomethacin molecules.

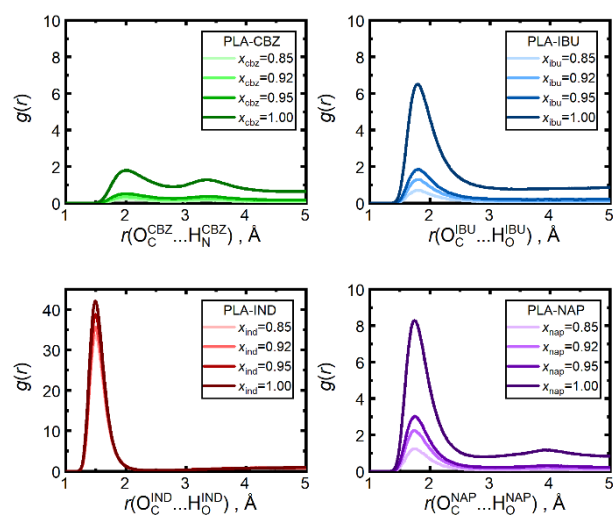

**Figure S6.** Radial distribution functions  $g(r)$  for intermolecular contacts of the API carboxyl/amide hydrogen atom ( $H_O/H_N$ ) with the API carbonyl oxygen atom ( $O_C$ ) in pure amorphous API and API-PLA mixtures simulated at 500 K. Signals from the mixtures are renormalized so that the unity value always corresponds to the average contact counts in neat bulk API.

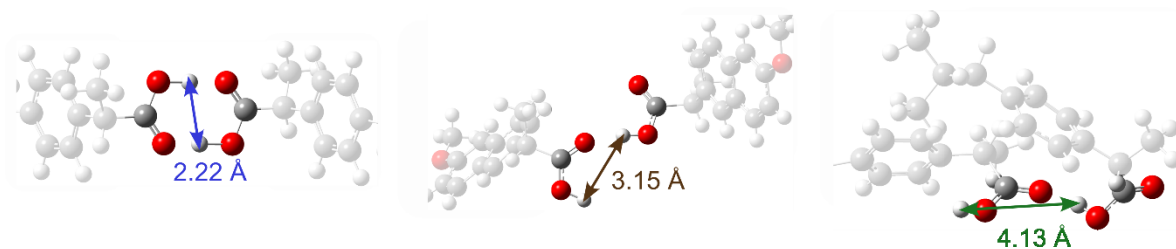

**Figure S7.** Illustration of the closest carboxyl dimers and carboxyl chain units representing important packing motifs of bulk API systems with the  $H_O \dots H_O$  contact distances taken from experimental crystal structures (first two configurations) and simulated bulk liquid phase (last configuration).

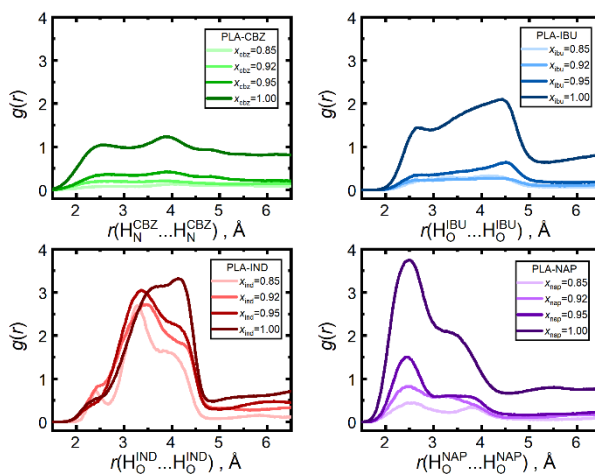

**Figure S8.** Radial distribution functions for contacts of the API carboxyl/amide hydrogen atoms ( $H_O/H_N$ ) in API-PLA mixtures and pure amorphous API simulated at 300 K.

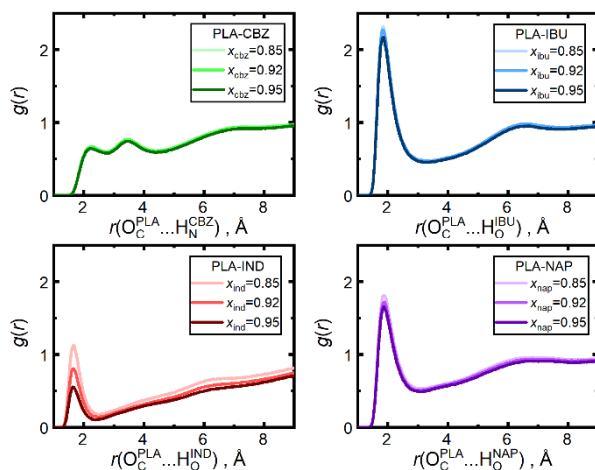

**Figure S9.** Radial distribution functions for contacts of the API carboxyl/amide hydrogen atom ( $H_O/H_N$ ) with the PLA carbonyl oxygen atom ( $O_C$ ) in API-PLA mixtures simulated at 500 K.

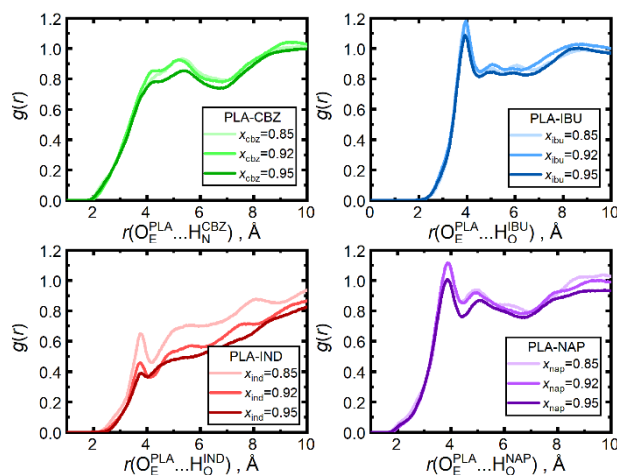

**Figure S10.** Radial distribution functions for contacts of the API carboxyl/amide hydrogen atom ( $H_O/H_N$ ) with the PLA ester oxygen atom ( $O_E$ ) in API-PLA mixtures simulated at 300 K.

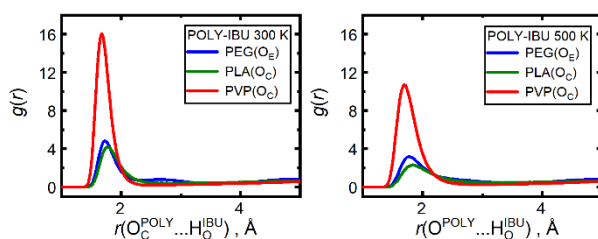

**Figure S11.** Radial distribution functions for contacts of the IBU carboxyl hydrogen atom ( $H_O$ ) with an oxygen atom being the most active acceptor of the hydrogen bond in the polymer chains in IBU-POLY mixtures simulated at 300 K and at 500 K.

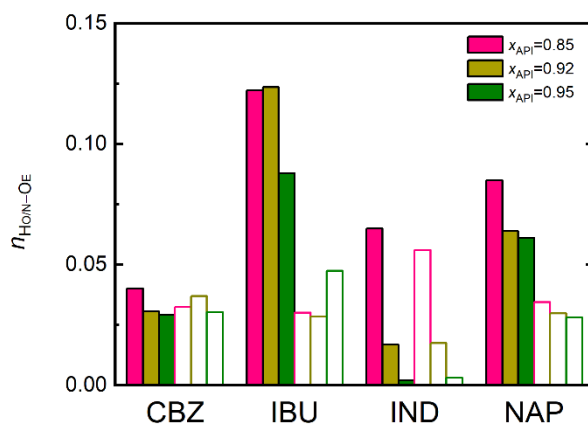

**Figure S12.** Coordination numbers for intermolecular contacts of the API carboxyl/amide hydrogen atom ( $H_O/H_N$ ) with the PLA ester oxygen atom ( $O_E$ ) in API-PLA mixtures simulated at 300 K (full columns) and 500 K (empty columns). Values correspond to the radius of the first coordination shell of the  $H_O/H_N-O_C$  contacts as the radius for these  $H_O/H_N-O_E$  contacts is excessively large.

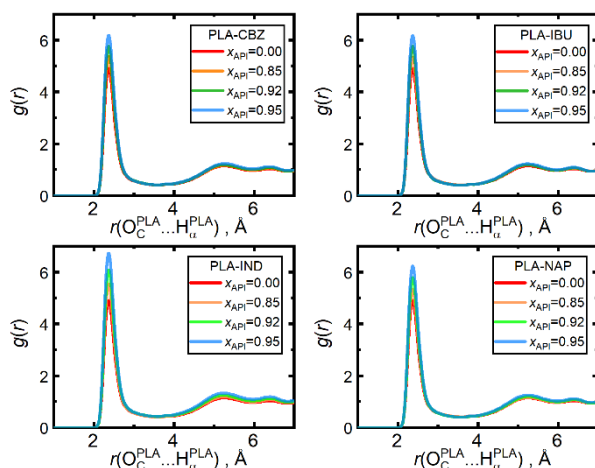

**Figure S13.** Radial distribution functions for intermolecular contacts of PLA fragments – between the carbonyl ( $O_C$ ) atom and the hydrogen atom bound to the  $\alpha$ -carbon being next to the carboxyl group ( $H_\alpha$ ) in the polymer chains in API-PLA mixtures and pure PLA simulated at 300 K.

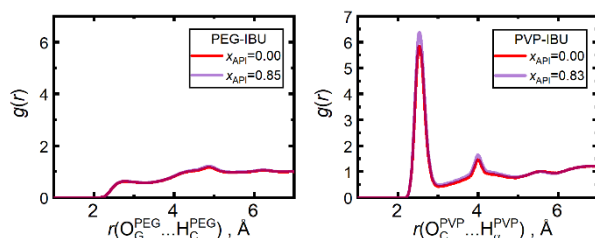

**Figure S14.** Radial distribution functions for intermolecular contacts of polymer fragments – between the ether ( $O_G$ ) atom and an adjacent hydrogen ( $H_C$ ) atom in PEG or the carbonyl oxygen ( $O_C$ ) atom and the hydrogen atom bound to the  $\alpha$ -carbon being next to the carboxyl group ( $H_\alpha$ ) in PVP in IBU-POLY mixtures and pure polymers simulated at 300 K.

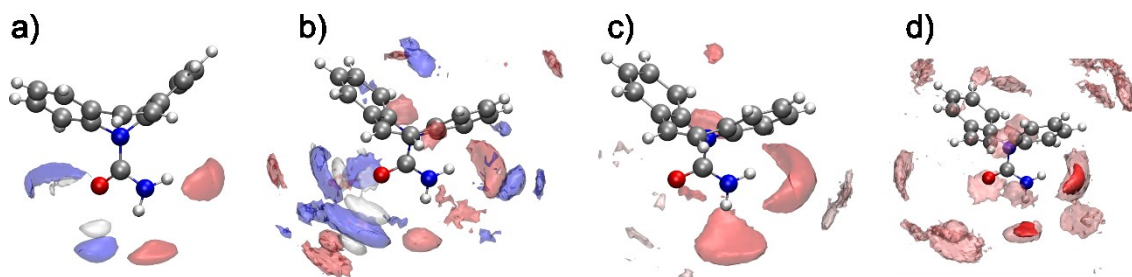

**Figure S15.** Spatial distribution functions around a fixed amide frame of CBZ molecules simulated at 300 K. Image legend: a) pure amorphous CBZ – red, blue, and white surfaces depict distribution of  $O_C$ ,  $N_H$ , and  $H_N$  atoms from neighboring CBZ molecules, respectively, all isovalues equal to 13; b) CBZ-PLA mixture with  $x_{API}=0.85$  – same coloring and atom types as in a); c) the same CBZ-PLA mixture – dark red and light red surfaces depict distribution of  $O_C$  and  $O_E$  atoms from neighboring PLA molecules, respectively, all isovalues equal to 3; d) the same CBZ-PLA mixture – dark red and light red surfaces depict distribution of  $O_C$  atoms from neighboring PLA and CBZ molecules, respectively, all isovalues equal to 8.

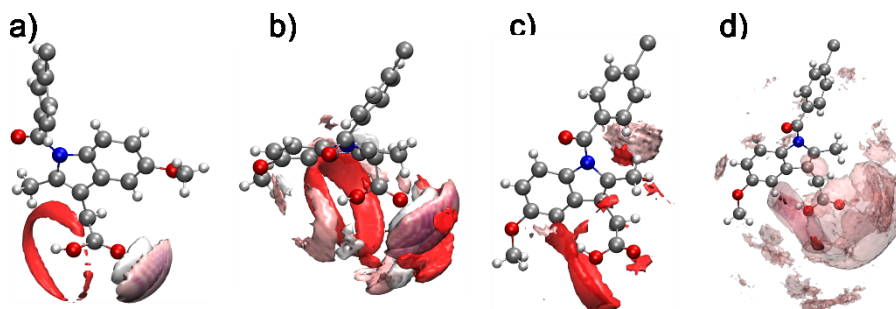

**Figure S16.** Spatial distribution functions around a fixed carboxyl frame of IND molecules simulated at 300 K. Image legend: a) pure amorphous IND – dark red, light red, and white surfaces depict distribution of  $O_C$ ,  $O_H$ , and  $H_O$  atoms from neighboring IND molecules, respectively, all isovalues equal to 40; b) IND-PLA mixture with  $x_{API}=0.85$  – same coloring and atom types as in a); c) the same IND-PLA mixture – dark red and light red surfaces depict distribution of  $O_C$  and  $O_E$  atoms from neighboring PLA molecules, respectively, all isovalues equal to 2.3; d) the same IND-PLA mixture – dark red and light red surfaces depict distribution of  $O_C$  atoms from neighboring PLA and IND molecules, respectively, all isovalues equal to 25.

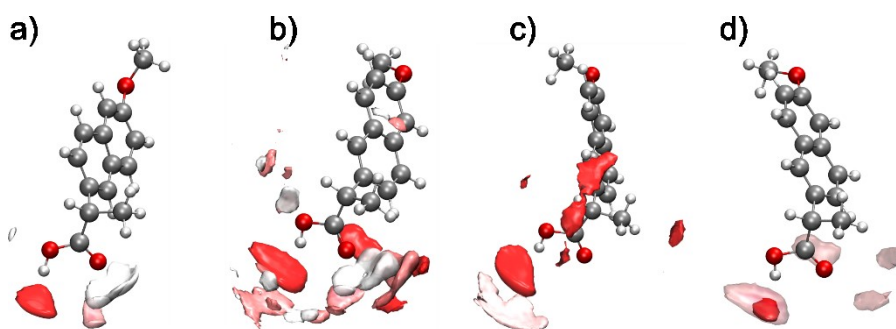

**Figure S17.** Spatial distribution functions around a fixed carboxyl frame of NAP molecules simulated at 300 K. Image legend: a) pure amorphous NAP – dark red, light red, and white surfaces depict distribution of  $O_C$ ,  $O_H$ , and  $H_O$  atoms from neighboring NAP molecules, respectively, all isovalues equal to 20; b) NAP-PLA mixture with  $x_{API}=0.85$  – same coloring and atom types as in a); c) the same NAP-PLA mixture – dark red and light red surfaces depict distribution of  $O_C$  and  $O_E$  atoms from neighboring PLA molecules, respectively, all isovalues equal to 4; d) the same NAP-PLA mixture – dark red and light red surfaces depict distribution of  $O_C$  atoms from neighboring PLA and NAP molecules, respectively, all isovalues equal to 28.



### S3. Non-covalent interaction analysis

This section contains results of the quantum-chemical NCI analysis and related reduced-density gradient plots with a graphical legend focusing on the center of the most intensive interactions.

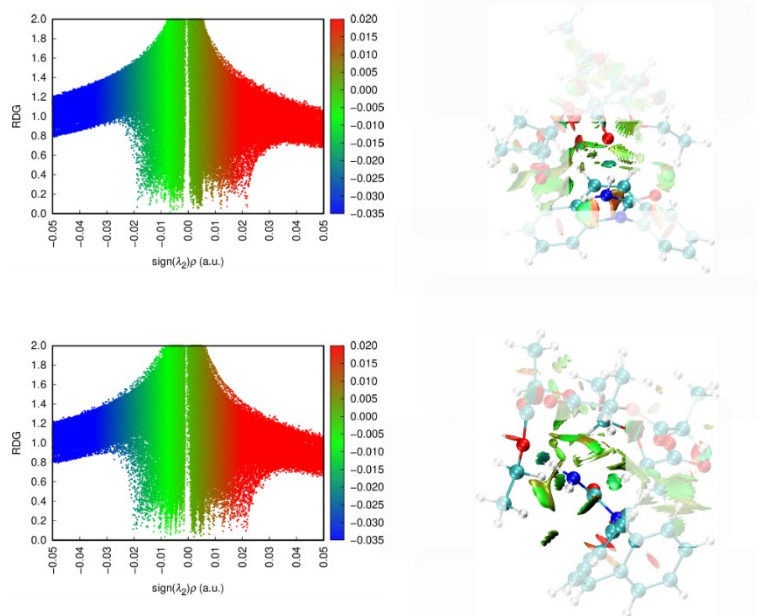

**Figure S18.** Analysis of non-covalent interactions of a PLA oligomer surrounding the amide moiety of CBZ in terms of critical points of the reduced density gradient plot and the signed electron density. Top row – conformation with a strong  $H_N^{CBZ} \dots O_C^{PLA}$  hydrogen bond (dark blue RDG isosurface); Bottom row – conformation with a weak  $H_N^{CBZ} \dots O_E^{PLA}$  hydrogen bond (light blue RDG isosurface). Attractive dispersion interactions depicted with green isosurfaces, repulsive interactions depicted with yellow to red shades.

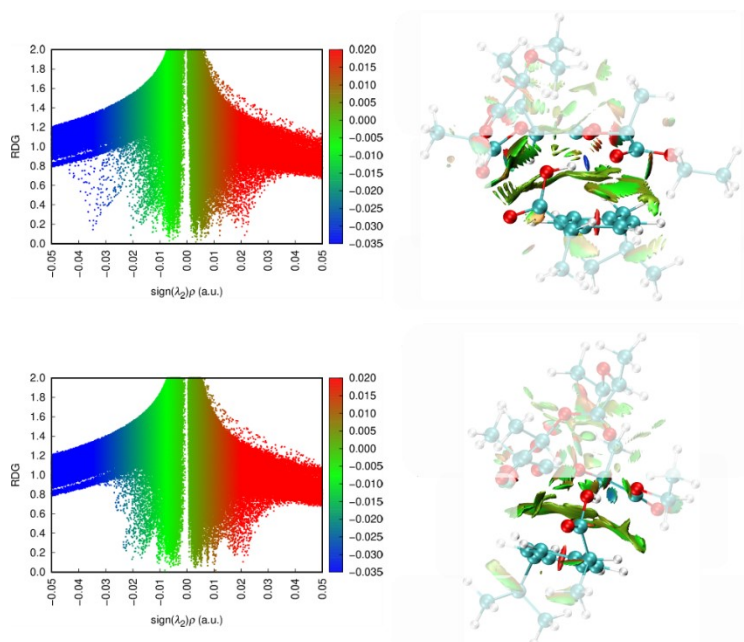

**Figure S19.** Analysis of non-covalent interactions of a PLA oligomer surrounding the carboxyl moiety of IBU in terms of critical points of the reduced density gradient plot and the signed electron density. Top row – conformation with a strong  $H_O^{IBU} \dots O_C^{PLA}$  hydrogen bond (dark blue RDG isosurface); Bottom row – conformation with a weak  $H_O^{IBU} \dots O_E^{PLA}$  hydrogen bond (light blue RDG isosurface). Attractive dispersion interactions depicted with green isosurfaces, repulsive interactions depicted with yellow to red shades.

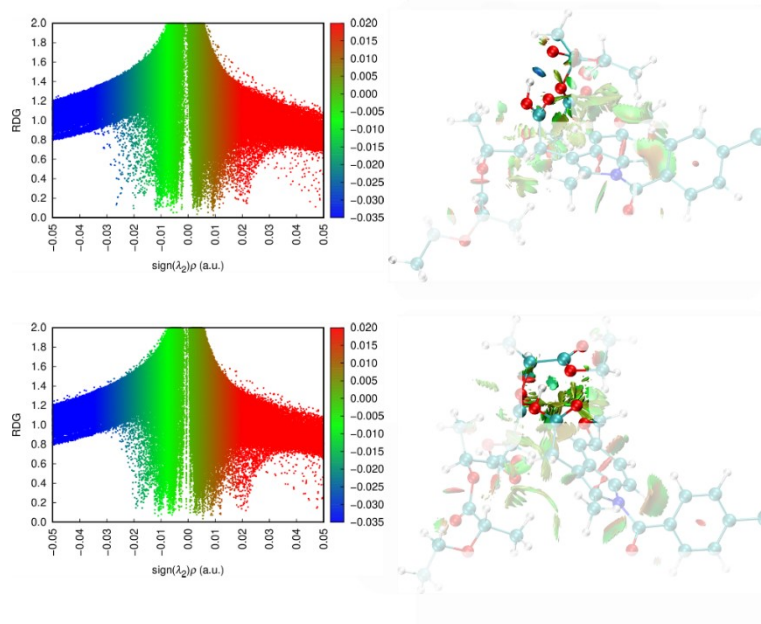

**Figure S20.** Analysis of non-covalent interactions of a PLA oligomer surrounding the carboxyl moiety of IND in terms of critical points of the reduced density gradient plot and the signed electron density. Top row – conformation with a strong  $\text{H}_\text{O}^{\text{IND}} \dots \text{O}_\text{C}^{\text{PLA}}$  hydrogen bond (dark blue RDG isosurface); Bottom row – conformation with a weak  $\text{H}_\text{O}^{\text{IND}} \dots \text{O}_\text{E}^{\text{PLA}}$  hydrogen bond (light blue RDG isosurface). Attractive dispersion interactions depicted with green isosurfaces, repulsive interactions depicted with yellow to red shades.

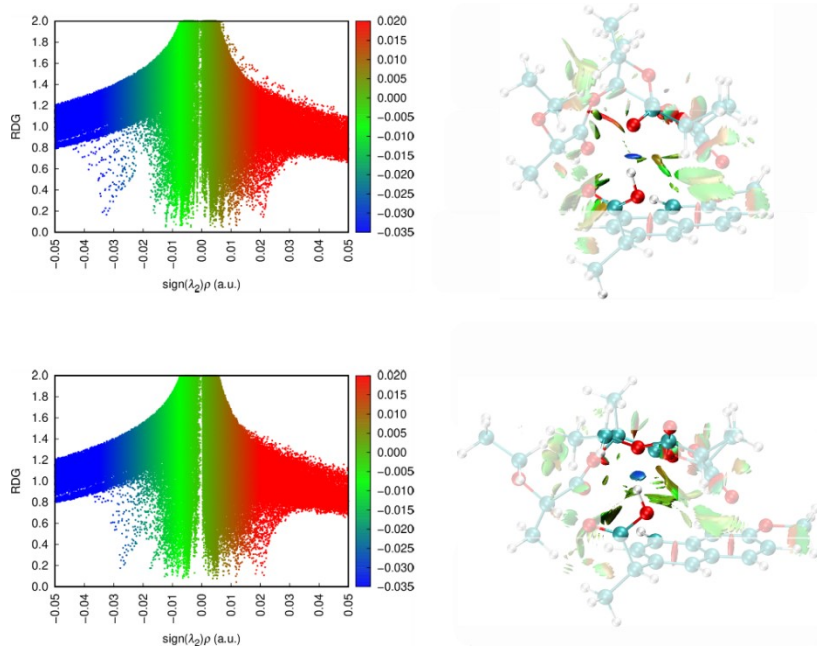

**Figure S21.** Analysis of non-covalent interactions of a PLA oligomer surrounding the carboxyl moiety of NAP in terms of critical points of the reduced density gradient plot and the signed electron density. Top row – conformation with a strong  $\text{H}_\text{O}^{\text{NAP}} \dots \text{O}_\text{C}^{\text{PLA}}$  hydrogen bond (dark blue RDG isosurface); Bottom row – conformation with a weak  $\text{H}_\text{O}^{\text{NAP}} \dots \text{O}_\text{E}^{\text{PLA}}$  hydrogen bond (light blue RDG isosurface). Attractive dispersion interactions depicted with green isosurfaces, repulsive interactions depicted with yellow to red shades.

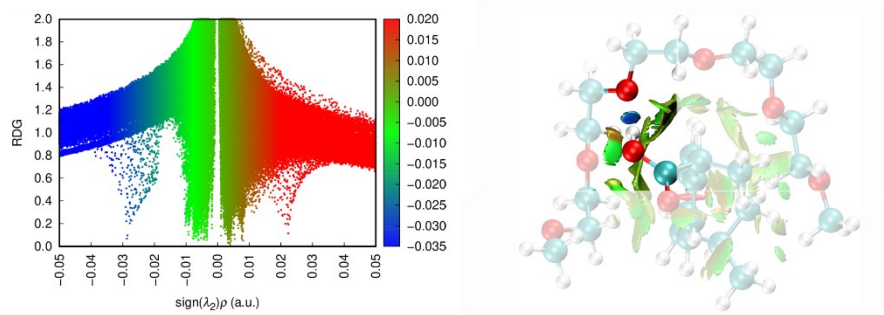

**Figure S22.** Analysis of non-covalent interactions of a PEG oligomer surrounding the carboxyl moiety of IBU in terms of critical points of the reduced density gradient plot and the signed electron density. Conformation with a  $\text{H}_\text{O}^{\text{IBU}} \dots \text{O}_\text{E}^{\text{PEG}}$  hydrogen bond (blue RDG isosurface). Attractive dispersion interactions depicted with green isosurfaces, repulsive interactions depicted with yellow to red shades.

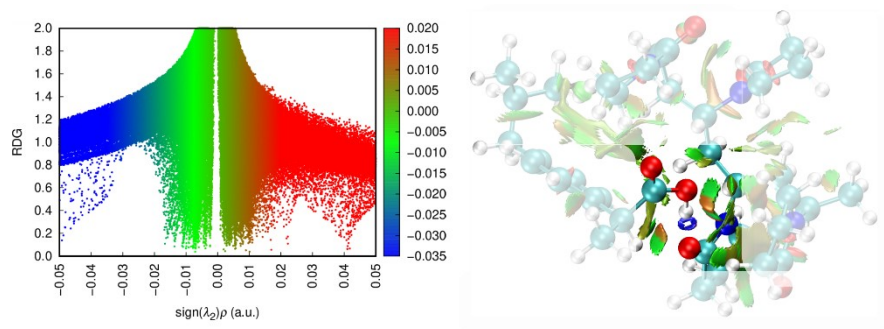

**Figure S23.** Analysis of non-covalent interactions of a PVP oligomer surrounding the carboxyl moiety of IBU in terms of critical points of the reduced density gradient plot and the signed electron density. Conformation with a strong  $\text{H}_\text{O}^{\text{IBU}} \dots \text{O}_\text{C}^{\text{PVP}}$  hydrogen bond (dark blue RDG isosurface). Attractive dispersion interactions depicted with green isosurfaces, repulsive interactions depicted with yellow to red shades.

## S4. Inner dynamics

This section contains additional simulation results on inner dynamics of bulk mixtures of target API and polymers. Plots of molecular mean-square displacements as functions of simulation time are given below.

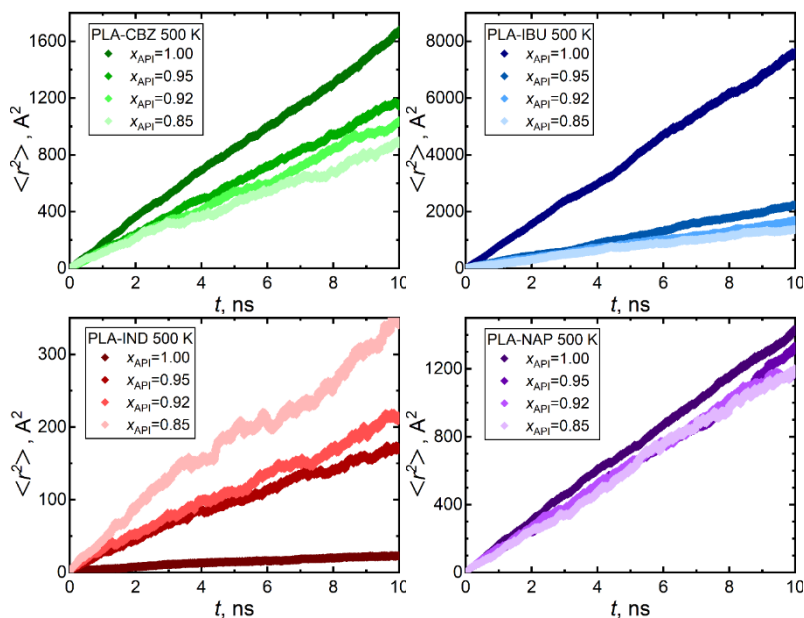

**Figure S24.** Mean-square displacements of API molecules as functions of time in various bulk systems simulated at 500 K.

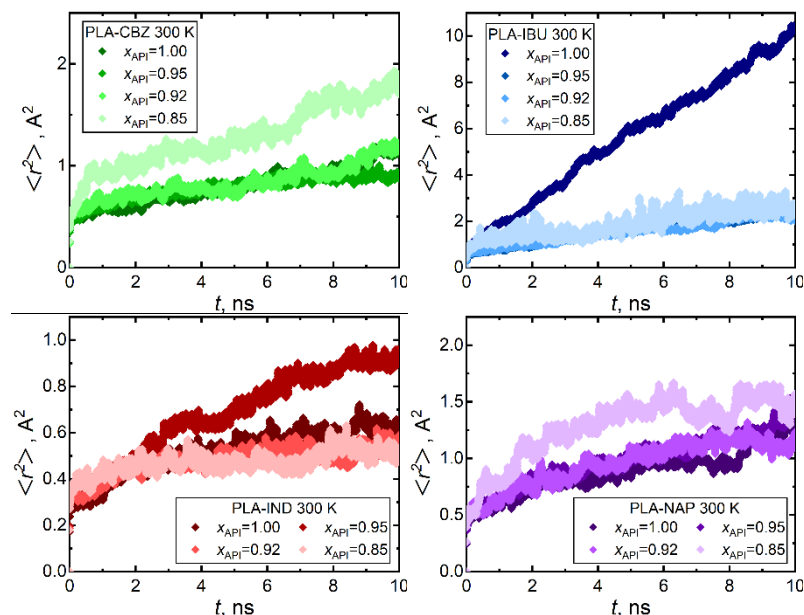

**Figure S25.** Mean-square displacements of API molecules as functions of time in various bulk systems simulated at 300 K.

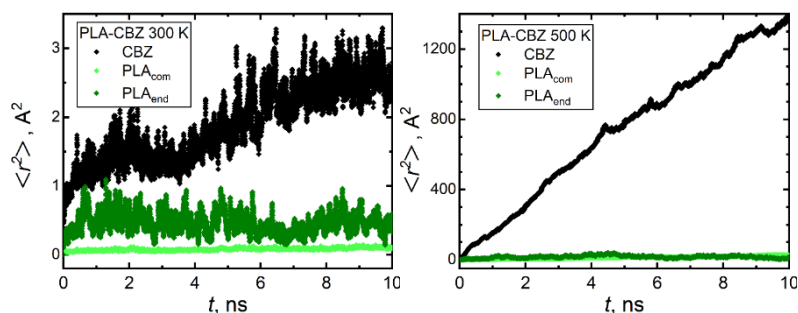

**Figure S26.** Mean-square displacements of CBZ molecules, centers of mass (com) and end groups of PLA chains as functions of time in bulk mixtures with  $x_{API}=0.85$  simulated at 300 K and at 500 K. Data smoothed using a 10 ps running average window.

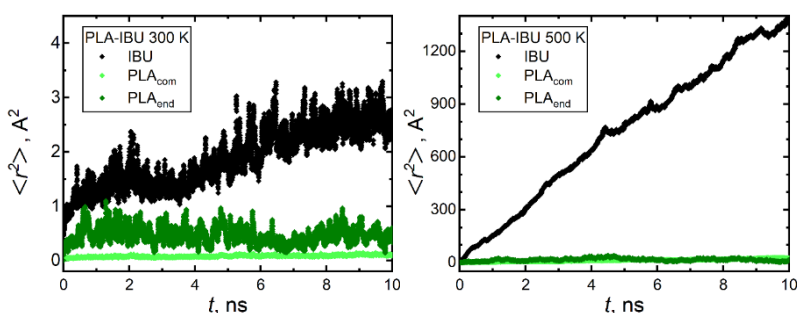

**Figure S27.** Mean-square displacements of IBU molecules, centers of mass (com) and end groups of PLA chains as functions of time in bulk mixtures with  $x_{API}=0.85$  simulated at 300 K and at 500 K. Data smoothed using a 10 ps running average window.

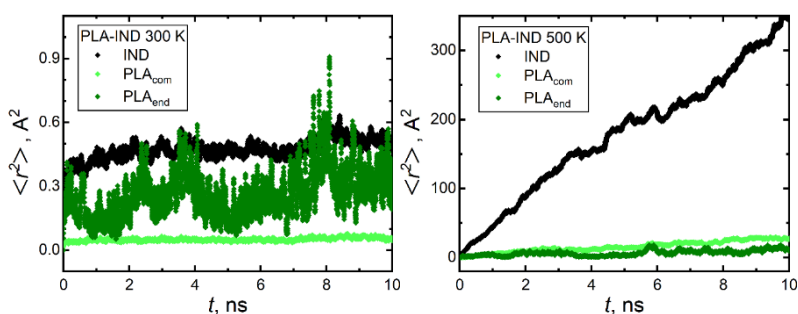

**Figure S28.** Mean-square displacements of IND molecules, centers of mass (com) and end groups of PLA chains as functions of time in bulk mixtures with  $x_{API}=0.85$  simulated at 300 K and at 500 K. Data smoothed using a 10 ps running average window.

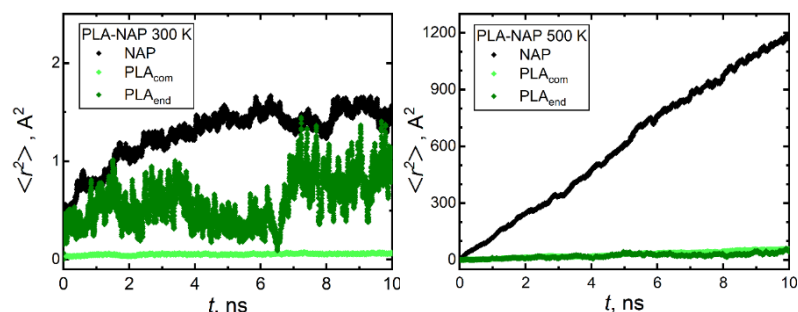

**Figure S29.** Mean-square displacements of NAP molecules, centers of mass (com) and end groups of PLA chains as functions of time in bulk mixtures with  $x_{API}=0.85$  simulated at 300 K and at 500 K. Data smoothed using a 10 ps running average window.

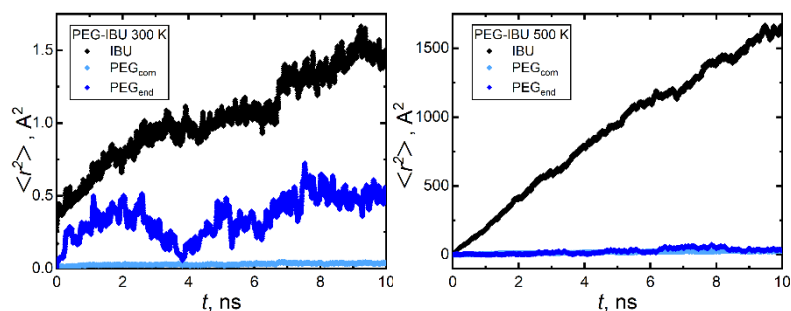

**Figure S30.** Mean-square displacements of IBU molecules, centers of mass (com) and end groups of PEG chains as functions of time in bulk mixtures with  $x_{\text{API}}=0.85$  simulated at 300 K and at 500 K. Data smoothed using a 20 ps running average window.

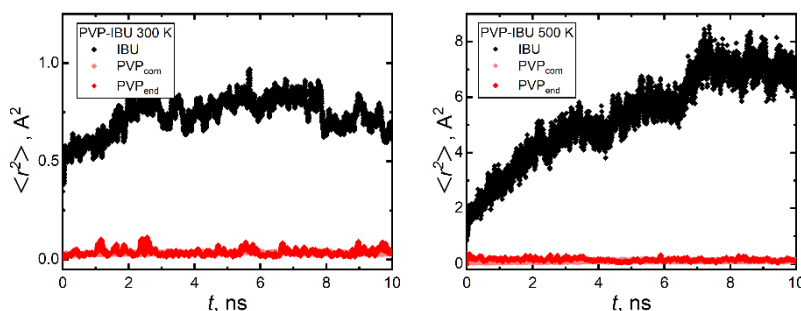

**Figure S31.** Mean-square displacements of IBU molecules, centers of mass (com) and end groups of PVP chains as functions of time in bulk mixtures with  $x_{\text{API}}=0.85$  simulated at 300 K and at 500 K. Data smoothed using a 20 ps running average window.

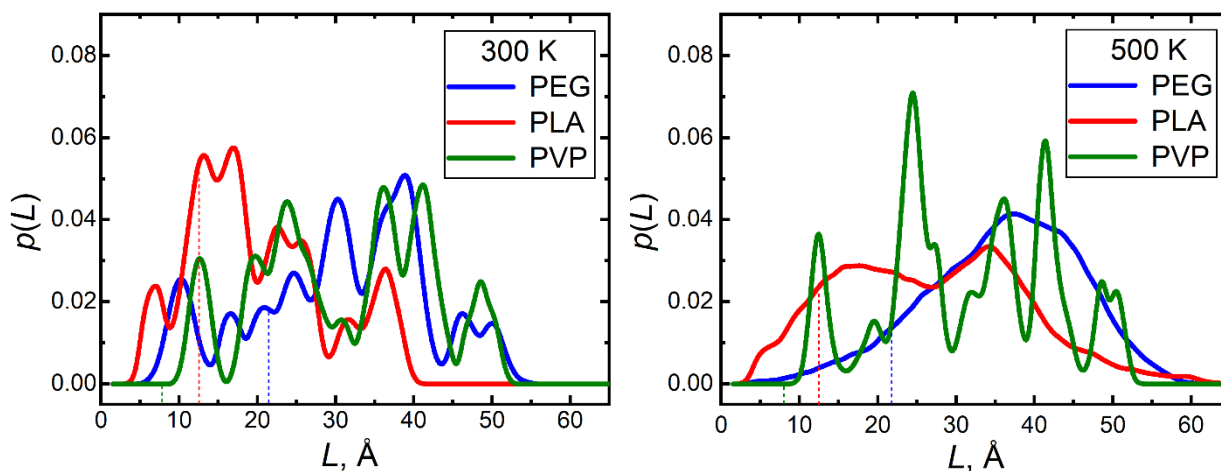

**Figure S32.** Histograms of the occurrence  $p(L)$  of instantaneous end-to-end distances  $L$  of individual polymer chains derived from the MD simulation of bulk mixtures with the ibuprofen content  $x_{\text{API}}=0.85$ . Vertical dashed lines denote the end-to-end distance in the original globular conformation that was packed upon building of the simulation box.

## S5. Glass-transition temperatures

This section contains additional simulation results on the glass-transition temperatures of bulk one-mixtures of target API and polymers. Numerical lists of the calculated results are given below.

**Table S2**

Results on  $T_g$  (in K) determined from individual simulated cooling runs for the considered mixtures the composition of which always corresponds to  $x_{\text{API}}=0.85$ .

| System  | Run 1           | Run 2           | Run 3           | Run 4           | Run 5           | Average      |
|---------|-----------------|-----------------|-----------------|-----------------|-----------------|--------------|
| PLA-CBZ | $362.0 \pm 1.9$ | $373.2 \pm 1.2$ | $380.3 \pm 1.9$ | $363.9 \pm 1.5$ | $373.0 \pm 0.4$ | $371 \pm 8$  |
| PLA-IBU | $364.0 \pm 0.3$ | $362.2 \pm 0.4$ | $362.2 \pm 1.7$ | $364.8 \pm 0.3$ | $360.2 \pm 2.4$ | $363 \pm 3$  |
| PLA-IND | $378.6 \pm 5.4$ | $369.0 \pm 7.1$ | $375.1 \pm 2.4$ | $390 \pm 6.0$   | $385.6 \pm 3.4$ | $380 \pm 14$ |
| PLA-NAP | $374.4 \pm 0.4$ | $364.4 \pm 0.4$ | $381.0 \pm 0.6$ | $366.5 \pm 0.4$ | $364.6 \pm 0.3$ | $370 \pm 8$  |

**Table S3**

Comparison of simulated  $T_g$  (in K) values obtained in this work for pure compounds with previously determined experimental data.

| System | Simulation   | Experiment | Source                              |
|--------|--------------|------------|-------------------------------------|
| PLA    | $369 \pm 3$  | 333        | ref. <sup>1</sup> and refs. therein |
| CBZ    | $384 \pm 13$ | 315        | ref. <sup>2</sup>                   |
| IBU    | $295 \pm 13$ | 228        | ref. <sup>2</sup>                   |
| IND    | $388 \pm 21$ | 313        | ref. <sup>2</sup>                   |
| NAP    | $343 \pm 13$ | 278        | ref. <sup>2</sup>                   |

1. Klajmon, M.; Aulich, V.; Ludík, J.; Červinka, C., Glass Transition and Structure of Organic Polymers from All-Atom Molecular Simulations. *Industrial & Engineering Chemistry Research* **2023**, *62* (49), 21437-21448.
2. Štejfá, V.; Pokorný, V.; Mathers, A.; Růžička, K.; Fulem, M., Heat capacities of selected active pharmaceutical ingredients. *The Journal of Chemical Thermodynamics* **2021**, *163*, 106585.
